# Supplementary material for: Engineering TadA ortholog-derived cytosine base editor without motif preference and adenosine activity limitation
Source: Research Square preprint supplement (doi:10.21203/rs.3.rs-3876111/v1), 2024-02-27
Supplement: Supplementary file 1 [file 1c93f7440e271800cc11e147.xlsx]

## Sheet: S1
Supplementary Table 1.	Protein and Reporter sequences in this study.
	Fig	Protein	Coding sequence
Reporter: BFP-P2A-Target-EGFP	Fig1	MSELIKENMHMKLYMEGTVDNHHFKCTSEGEGKPYEGTQTMRIKVVEGGPLPFAFDILATSFLYGSKTFINHTQGIPDFFKQSFPEGFTWERVTTYEDGGVLTATQDTSLQDGCLIYNVKIRGVNFTSNGPVMQKKTLGWEAFTETLYPADGGLEGRNDMALKLVGGSHLIANIKTTYRSKKPAKNLKMPGVYYVDYRLERIKEANNETYVEQHEVAVARYCDLPSKLGHKLNLKATNFSLLKQAGDVEENPGPCTRLSLPKSD*YQERSDSGVSKGEELFTGVVPILVELDGDVNGHKFSVSGEGEGDATYGKLTLKFICTTGKLPVPWPTLVTTLTYGVQCFSRYPDHMKQHDFFKSAMPEGYVQERTIFFKDDGNYKTRAEVKFEGDTLVNRIELK…	ATGAGCGAGCTGATTAAGGAGAACATGCACATGAAGCTGTATATGGAGGGCACCGTGGACAACCATCACTTCAAGTGCACATCCGAGGGCGAAGGCAAGCCCTACGAGGGCACCCAGACCATGAGAATCAAGGTGGTCGAGGGCGGCCCTCTCCCCTTCGCCTTCGACATCCTGGCTACTAGCTTCCTCTACGGCAGCAAGACCTTCATCAACCACACCCAGGGCATCCCCGACTTCTTCAAGCAGTCCTTCCCTGAGGGCTTCACATGGGAGAGAGTCACCACATACGAGGACGGGGGCGTGCTGACCGCTACCCAGGACACCAGCCTCCAGGACGGCTGCCTCATCTACAACGTCAAGATCAGAGGGGTGAACTTCACATCCAACGGCCCTGTGATG…
NLS-Td-CGBE-SpG Cas9 (D10A)-NLS		MKRTADGSEFESPKKKRKVSEVEFSHEYWMRHALTLAKRARDEREVPVGAVLVLNNRVIGEGWLRAIGLHDPTAHAEIMALRQGGLVMQNYRLIDATLYVTFEPCVMCAGAMIHSRIGRVVFGVRNSKRGAAGSLMNVLNYPGMNHRVEITEGILADECAALLCDFYRMPRQVFNAQKKAQSSINSGGSSGGSSGSETPGTSESATPESSGGSSGGSDKKYSIGLAIGTNSVGWAVITDEYKVPSKKFKVLGNTDRHSIKKNLIGALLFDSGETAEATRLKRTARRRYTRRKNRICYLQEIFSNEMAKVDDSFFHRLEESFLVEEDKKHERHPIFGNIVDEVAYHEKYPTIYHLRKKLVDSTDKADLRLIYLALAHMIKFRGHFLIEGDLNPDNSDVDK…	ATGAAACGGACAGCCGACGGAAGCGAGTTCGAGTCACCAAAGAAGAAGCGGAAAGTCTCTGAGGTGGAGTTTTCCCACGAGTACTGGATGAGACATGCCCTGACCCTGGCCAAGAGGGCACGCGATGAGAGGGAGGTGCCTGTGGGAGCCGTGCTGGTGCTGAACAATAGAGTGATCGGCGAGGGCTGGCTGAGAGCCATCGGCCTGCACGACCCAACAGCCCATGCCGAAATTATGGCCCTGAGACAGGGCGGCCTGGTCATGCAGAACTACAGACTGATTGACGCCACCCTGTACGTGACATTCGAGCCTTGCGTGATGTGCGCCGGCGCCATGATCCACTCTAGGATCGGCCGCGTGGTGTTTGGCGTGAGGAACTCAAAAAGAGGCGCCGCAGGC…
NLS-BbTadA-SpG Cas9 (D10A)-NLS		MKRTADGSEFESPKKKRKVMEHDQDIYFMQLAIEEAKKAEAIQEVPIGAVIVLDGEVISVAHNLRETEQRSIAHAELLAIDEACKKLGTWRLEDATLYVTLEPCPMCAGGIVLSRVKRVVYGVSNPKGGCAGTLMNLLTDERFNHQCEVVAGVLEGECGTLLTYFFRELRKVRKAIKKLEKSKENSGGSSGGSSGSETPGTSESATPESSGGSSGGSDKKYSIGLAIGTNSVGWAVITDEYKVPSKKFKVLGNTDRHSIKKNLIGALLFDSGETAEATRLKRTARRRYTRRKNRICYLQEIFSNEMAKVDDSFFHRLEESFLVEEDKKHERHPIFGNIVDEVAYHEKYPTIYHLRKKLVDSTDKADLRLIYLALAHMIKFRGHFLIEGDLNPDNSDVDK…	ATGAAACGGACAGCCGACGGAAGCGAGTTCGAGTCACCAAAGAAGAAGCGGAAAGTCATGGAACACGACCAGGACATCTACTTTATGCAGCTGGCCATCGAGGAAGCCAAGAAGGCCGAGGCCATCCAGGAGGTGCCAATCGGCGCCGTGATCGTGCTGGACGGCGAGGTGATCAGCGTGGCTCATAATCTGAGGGAAACCGAGCAGAGATCTATCGCCCACGCCGAGCTGCTGGCTATCGACGAGGCTTGTAAAAAGCTGGGCACCTGGCGGCTGGAAGATGCCACACTGTACGTGACCCTCGAGCCTTGCCCTATGTGCGCCGGAGGAATCGTGCTGAGCAGAGTGAAGCGGGTGGTCTACGGCGTGTCCAACCCCAAGGGCGGCTGCGCCGGCACA…
NLS-AjTadA-SpG Cas9 (D10A)-NLS		MKRTADGSEFESPKKKRKVMTVNKDEYWMQFAYEQAAIAASQGEIPVGAVIVSQDKIIGSGYNAPIQLSDPTAHAEIQALRSACRAIENYRLPDDAVLYVTLEPCTMCVGALIHARVQKVIFAVTNPKAGSVVSARQLLDNGYYNHKFVFEQGCLQQQCSAQLSYFFKHRRKVKKQAHLSKTSLNDSGGSSGGSSGSETPGTSESATPESSGGSSGGSDKKYSIGLAIGTNSVGWAVITDEYKVPSKKFKVLGNTDRHSIKKNLIGALLFDSGETAEATRLKRTARRRYTRRKNRICYLQEIFSNEMAKVDDSFFHRLEESFLVEEDKKHERHPIFGNIVDEVAYHEKYPTIYHLRKKLVDSTDKADLRLIYLALAHMIKFRGHFLIEGDLNPDNSDVD…	ATGAAACGGACAGCCGACGGAAGCGAGTTCGAGTCACCAAAGAAGAAGCGGAAAGTCATGACCGTGAATAAGGACGAGTACTGGATGCAATTTGCCTACGAGCAGGCCGCCATTGCCGCTTCTCAGGGCGAAATCCCCGTGGGAGCCGTGATCGTGTCCCAGGACAAGATCATCGGCTCCGGCTATAATGCCCCTATCCAGCTGTCTGATCCTACCGCCCACGCTGAAATCCAGGCCCTGAGAAGCGCATGCAGAGCCATCGAGAACTACCGGCTGCCTGATGACGCCGTGCTGTACGTCACACTGGAACCCTGCACCATGTGCGTGGGCGCCCTGATCCACGCCAGAGTGCAGAAAGTGATCTTCGCCGTTACAAACCCAAAGGCCGGCAGCGTGGTC…
NLS-LcTadA-SpG Cas9 (D10A)-NLS		MKRTADGSEFESPKKKRKVMLSGEDKKKYMQLAIDQAKEAEKQGEVPIGAVVVDPDGRVVGTGYNRRELDEDATQHAEMIAIKEACSKLGMWRLIDCSLFVTLEPCPMCAGAIINSRIKDVYFGVLNPKAGACGSVVDLFSVEKFNHHPHAIRGLYRDQCAQMLKYFFRAIREVQKAAKLAQKEVSGGSSGGSSGSETPGTSESATPESSGGSSGGSDKKYSIGLAIGTNSVGWAVITDEYKVPSKKFKVLGNTDRHSIKKNLIGALLFDSGETAEATRLKRTARRRYTRRKNRICYLQEIFSNEMAKVDDSFFHRLEESFLVEEDKKHERHPIFGNIVDEVAYHEKYPTIYHLRKKLVDSTDKADLRLIYLALAHMIKFRGHFLIEGDLNPDNSDVDK…	ATGAAACGGACAGCCGACGGAAGCGAGTTCGAGTCACCAAAGAAGAAGCGGAAAGTCATGCTGTCCGGCGAGGATAAGAAGAAATACATGCAGCTGGCCATCGATCAGGCCAAGGAGGCCGAGAAGCAGGGCGAGGTGCCCATCGGCGCCGTGGTGGTGGACCCTGATGGAAGAGTGGTGGGCACCGGCTACAATAGAAGGGAACTGGACGAGGACGCCACACAGCACGCCGAGATGATCGCCATTAAGGAGGCCTGCAGCAAGCTGGGCATGTGGCGGCTGATCGACTGCAGCCTGTTTGTGACCCTGGAACCATGCCCTATGTGCGCCGGAGCCATCATCAACAGCAGAATCAAGGACGTGTACTTCGGCGTGCTGAACCCCAAGGCCGGAGCTTGT…
NLS-Bb2TadA-SpG Cas9 (D10A)-NLS		MKRTADGSEFESPKKKRKVMKKNHDYMRLAINEAHKAKALGEVPIGAVIVKEGQVIARAHNLRETLQQPTAHAEHIAIERASEVVGSWRLEECTLYVTLEPCVMCAGTIIMSRIPKVVYGVTNPKGGCSGSLMNLLEQPQFNHRATVEKGILEEECAELLRYFFKEIREVKKAEKQGKIQKDINLLKSGGSSGGSSGSETPGTSESATPESSGGSSGGSDKKYSIGLAIGTNSVGWAVITDEYKVPSKKFKVLGNTDRHSIKKNLIGALLFDSGETAEATRLKRTARRRYTRRKNRICYLQEIFSNEMAKVDDSFFHRLEESFLVEEDKKHERHPIFGNIVDEVAYHEKYPTIYHLRKKLVDSTDKADLRLIYLALAHMIKFRGHFLIEGDLNPDNSDV…	ATGAAACGGACAGCCGACGGAAGCGAGTTCGAGTCACCAAAGAAGAAGCGGAAAGTCATGAAAAAGAACCACGATTATATGAGGCTGGCCATTAACGAGGCCCACAAGGCCAAGGCCCTGGGCGAGGTGCCAATCGGCGCCGTGATCGTGAAGGAAGGCCAGGTGATCGCTAGAGCCCATAATCTGAGAGAGACACTGCAGCAGCCTACCGCCCACGCCGAGCACATCGCCATCGAGAGAGCCTCCGAGGTCGTGGGCTCTTGGCGGCTGGAAGAGTGCACCCTGTACGTGACCCTGGAACCCTGCGTGATGTGCGCCGGCACCATCATCATGAGCAGAATCCCCAAGGTGGTGTACGGCGTGACCAATCCTAAGGGAGGCTGCAGCGGAAGCCTGATG…
NLS-EbTadA-SpG Cas9 (D10A)-NLS		MKRTADGSEFESPKKKRKVMERDERFMQLAIEEAKKAEAIGEVPIGCVIVKGDEVVATGHNRRETDLLAAAHAEMIAIESANRSLGNWRLEDCELYVTLEPCPMCAGAIVLSRVKRVIFGVHNPKGGCCGTLMNLVQDERFNHQADVTENVLAEECGRLLTYFFRALREVKKQERLHQRGCNPIDSGGSSGGSSGSETPGTSESATPESSGGSSGGSDKKYSIGLAIGTNSVGWAVITDEYKVPSKKFKVLGNTDRHSIKKNLIGALLFDSGETAEATRLKRTARRRYTRRKNRICYLQEIFSNEMAKVDDSFFHRLEESFLVEEDKKHERHPIFGNIVDEVAYHEKYPTIYHLRKKLVDSTDKADLRLIYLALAHMIKFRGHFLIEGDLNPDNSDVDK…	ATGAAACGGACAGCCGACGGAAGCGAGTTCGAGTCACCAAAGAAGAAGCGGAAAGTCATGGAAAGGGATGAACGGTTTATGCAGCTGGCCATTGAGGAAGCCAAGAAGGCCGAGGCCATCGGCGAGGTGCCTATCGGATGCGTGATCGTGAAAGGCGACGAGGTCGTGGCCACAGGCCACAACCGGAGAGAGACAGATCTGCTGGCCGCTGCTCACGCCGAAATGATCGCCATCGAGAGCGCCAACAGAAGCCTGGGAAATTGGCGGCTCGAGGACTGCGAGCTGTACGTGACCCTGGAACCATGTCCTATGTGCGCCGGCGCCATCGTTCTGTCTAGAGTGAAGCGGGTGATCTTCGGCGTGCACAACCCCAAGGGCGGCTGCTGCGGCACCCTGATG…
NLS-ErTadA-SpG Cas9 (D10A)-NLS		MKRTADGSEFESPKKKRKVMERESQLTEEEKIYFMQEAIKEARKAEEIEEVPIGAIIVHQGKIIGRGHNLREHSQDATSHAEMFAIREACSHLGSWRLEECQLFVTLEPCPMCSGGMILSRVEEVYFGVYNPKGGTAGTLMNLLTDERFNHRAYVEGGILEAECGTLLTYFFRAIRAVKKKTSQNESGGSSGGSSGSETPGTSESATPESSGGSSGGSDKKYSIGLAIGTNSVGWAVITDEYKVPSKKFKVLGNTDRHSIKKNLIGALLFDSGETAEATRLKRTARRRYTRRKNRICYLQEIFSNEMAKVDDSFFHRLEESFLVEEDKKHERHPIFGNIVDEVAYHEKYPTIYHLRKKLVDSTDKADLRLIYLALAHMIKFRGHFLIEGDLNPDNSDVD…	ATGAAACGGACAGCCGACGGAAGCGAGTTCGAGTCACCAAAGAAGAAGCGGAAAGTCATGGAAAGAGAGAGCCAACTGACCGAGGAGGAGAAGATCTACTTTATGCAGGAGGCTATCAAGGAAGCCAGAAAGGCCGAGGAAATCGAGGAGGTCCCCATTGGCGCCATCATCGTGCACCAGGGCAAGATCATCGGAAGAGGCCATAATCTGAGAGAGCACTCTCAGGACGCCACCAGCCACGCCGAGATGTTCGCCATCAGAGAGGCTTGCAGCCACCTGGGCTCCTGGCGGCTGGAAGAGTGCCAGCTGTTCGTGACCCTCGAGCCATGTCCTATGTGCTCTGGAGGCATGATCCTGAGCAGAGTGGAAGAAGTGTACTTCGGCGTGTACAACCCTAAG…
NLS-VbTadA-SpG Cas9 (D10A)-NLS		MKRTADGSEFESPKKKRKVMDERSRDEYFMGFALEEAHKAYALGEIPIGAILVQNNTIISRHHNRRELDHDATAHAEVLVIREACDVLKRWRLTGCTLYVTIEPCPMCAGAIINSRIDRVVYGVSNYKGGAVESLFNVLSHPGLNHEPELASGVLGDECSQIMKYFFKERRKVRRSTQEAEGSALEMRSGGSSGGSSGSETPGTSESATPESSGGSSGGSDKKYSIGLAIGTNSVGWAVITDEYKVPSKKFKVLGNTDRHSIKKNLIGALLFDSGETAEATRLKRTARRRYTRRKNRICYLQEIFSNEMAKVDDSFFHRLEESFLVEEDKKHERHPIFGNIVDEVAYHEKYPTIYHLRKKLVDSTDKADLRLIYLALAHMIKFRGHFLIEGDLNPDNSD…	ATGAAACGGACAGCCGACGGAAGCGAGTTCGAGTCACCAAAGAAGAAGCGGAAAGTCATGGACGAGAGAAGCAGAGATGAGTACTTTATGGGCTTCGCCCTCGAGGAAGCTCATAAGGCCTACGCCCTGGGCGAGATCCCTATCGGCGCCATCCTGGTTCAGAACAACACAATCATTTCTCGGCACCACAATAGAAGGGAACTGGACCACGACGCCACCGCCCACGCCGAGGTGCTGGTCATCAGAGAGGCATGCGACGTGCTGAAGCGGTGGAGACTGACCGGATGTACCCTGTACGTGACCATCGAGCCATGTCCTATGTGCGCCGGAGCTATCATCAACAGCCGCATCGATAGAGTGGTGTACGGCGTGTCCAACTATAAGGGCGGCGCCGTGGAA…
NLS-PsTadA-SpG Cas9 (D10A)-NLS		MKRTADGSEFESPKKKRKVMRQPPIIDRSNDQHFMREALALAAQGALLGEVPVGAVVVQNGEIIGRGYNCPISGSDPSAHAEMVAIRDAARALDNYRLPGSTLYVTLEPCSMCAGLIVHSRVARVVYGVLNPKAGIVQSQGQFFSQGFLNHRVLFEGGVLGEECGAMLSYFFRLRRAVKEAGKSPGSVSGGSSGGSSGSETPGTSESATPESSGGSSGGSDKKYSIGLAIGTNSVGWAVITDEYKVPSKKFKVLGNTDRHSIKKNLIGALLFDSGETAEATRLKRTARRRYTRRKNRICYLQEIFSNEMAKVDDSFFHRLEESFLVEEDKKHERHPIFGNIVDEVAYHEKYPTIYHLRKKLVDSTDKADLRLIYLALAHMIKFRGHFLIEGDLNPDNSD…	ATGAAACGGACAGCCGACGGAAGCGAGTTCGAGTCACCAAAGAAGAAGCGGAAAGTCATGCGGCAGCCTCCAATTATCGACAGATCCAACGACCAGCACTTCATGAGAGAGGCCCTGGCTCTGGCCGCTCAGGGCGCCCTGCTGGGCGAGGTGCCCGTGGGCGCCGTGGTGGTGCAGAACGGCGAAATCATCGGCAGAGGCTACAACTGCCCCATCAGCGGCTCTGATCCTAGCGCCCATGCCGAGATGGTGGCCATCAGAGATGCCGCCCGGGCCCTGGACAACTACCGGCTGCCTGGCTCTACACTGTATGTGACCCTGGAACCTTGTAGCATGTGCGCCGGACTGATCGTGCACAGCAGAGTCGCTAGAGTGGTCTACGGCGTGCTGAACCCCAAG…
NLS-StTadA-SpG Cas9 (D10A)-NLS		MKRTADGSEFESPKKKRKVMSDSEFTHEYWMRHALTLAQRAWDEGEVPVGAVLVHNNQVIGEGWNRPIGRHDPTAHAEIMALRQGGLVLQNYRLLDTTLYVTLEPCVMCAGAMVHSRIGHLVFGVRNAKTGAVGSLMDVPGHPGMNHAMQVTSGVLAPACSALLSYFFQMRRLVKKALKEAARKAVSGGSSGGSSGSETPGTSESATPESSGGSSGGSDKKYSIGLAIGTNSVGWAVITDEYKVPSKKFKVLGNTDRHSIKKNLIGALLFDSGETAEATRLKRTARRRYTRRKNRICYLQEIFSNEMAKVDDSFFHRLEESFLVEEDKKHERHPIFGNIVDEVAYHEKYPTIYHLRKKLVDSTDKADLRLIYLALAHMIKFRGHFLIEGDLNPDNSDVD…	ATGAAACGGACAGCCGACGGAAGCGAGTTCGAGTCACCAAAGAAGAAGCGGAAAGTCATGAGCGACAGCGAGTTTACCCACGAGTACTGGATGAGGCACGCCCTGACACTGGCCCAGAGAGCCTGGGATGAGGGCGAGGTGCCAGTGGGCGCCGTGCTGGTTCATAATAACCAGGTGATCGGCGAAGGCTGGAACCGGCCTATCGGCAGACACGATCCTACAGCCCACGCTGAAATCATGGCCCTGAGACAGGGCGGACTGGTGCTGCAGAACTACAGACTGCTGGACACCACCCTGTATGTGACCCTGGAACCCTGTGTGATGTGCGCCGGTGCTATGGTGCACTCTAGAATCGGCCACCTGGTGTTCGGCGTGCGGAACGCCAAGACCGGCGCTGTG…
ATdCBE (NLS-TadA-SpCas9(D10A)-2xUGI-NLS)	Fig3	MKRTADGSEFESPKKKRKVSTVNKDEYWMQFAYEQAAIAASQGAIPVGAVIVSQDKIIGSGYNAGIQLSDPTAHAEIQALRSACRAIENYRLPDDAVLYVTLEPCTMCVGALIHARVQKVIFAVTNPKAGSVVSARQLLDNGYYNHKFVFEQGCLQQQCSAQLSRFFKHRRKVKKQAHLSKTSLNDSGGSSGGSSGSETPGTSESATPESSGGSSGGSDKKYSIGLAIGTNSVGWAVITDEYKVPSKKFKVLGNTDRHSIKKNLIGALLFDSGETAEATRLKRTARRRYTRRKNRICYLQEIFSNEMAKVDDSFFHRLEESFLVEEDKKHERHPIFGNIVDEVAYHEKYPTIYHLRKKLVDSTDKADLRLIYLALAHMIKFRGHFLIEGDLNPDNSDVD…	ATGAAACGGACAGCCGACGGAAGCGAGTTCGAGTCACCAAAGAAGAAGCGGAAAGTCTCCACCGTGAATAAGGACGAGTACTGGATGCAATTTGCCTACGAGCAGGCCGCCATTGCCGCTTCTCAGGGCGCCATCCCCGTGGGAGCCGTGATCGTGTCCCAGGACAAGATCATCGGCTCCGGCTATAATGCCGGCATCCAGCTGTCTGATCCTACCGCCCACGCTGAAATCCAGGCCCTGAGAAGCGCATGCAGAGCCATCGAGAACTACCGGCTGCCTGATGACGCCGTGCTGTACGTCACACTGGAACCCTGCACCATGTGCGTGGGCGCCCTGATCCACGCCAGAGTGCAGAAAGTGATCTTCGCCGTTACAAACCCAAAGGCCGGCAGCGTGGTC…
TdCBEmax (NLS-TadA-SpCas9(D10A)-2xUGI-NLS)		MKRTADGSEFESPKKKRKVSSEVEFSHEYWMRHALTLAKRARDERRVPVGAVLVLNNRVIGEGWLRAIGLHDPTAHAEIMALRQGGLVMQNYRLIDATLYVTFEPCVMCAGAMIHSRIGRVVFGVRNSKRGAAGSLMNVLNYPGMNHRVEITEGILADECAALLCDFYRMPRQVFNAQKKAQSSINSGGSSGGSSGSETPGTSESATPESSGGSSGGSDKKYSIGLAIGTNSVGWAVITDEYKVPSKKFKVLGNTDRHSIKKNLIGALLFDSGETAEATRLKRTARRRYTRRKNRICYLQEIFSNEMAKVDDSFFHRLEESFLVEEDKKHERHPIFGNIVDEVAYHEKYPTIYHLRKKLVDSTDKADLRLIYLALAHMIKFRGHFLIEGDLNPDNSDVD…	ATGAAACGGACAGCCGACGGAAGCGAGTTCGAGTCACCAAAGAAGAAGCGGAAAGTCTCCTCTGAGGTGGAGTTTTCCCACGAGTACTGGATGAGACATGCCCTGACCCTGGCCAAGAGGGCACGCGATGAGAGGAGAGTGCCTGTGGGAGCCGTGCTGGTGCTGAACAATAGAGTGATCGGCGAGGGCTGGCTGAGAGCCATCGGCCTGCACGACCCAACAGCCCATGCCGAAATTATGGCCCTGAGACAGGGCGGCCTGGTCATGCAGAACTACAGACTGATTGACGCCACCCTGTACGTGACATTCGAGCCTTGCGTGATGTGCGCCGGCGCCATGATCCACTCTAGGATCGGCCGCGTGGTGTTTGGCGTGAGGAACTCAAAAAGAGGCGCCGCA…
TdCBEd (NLS-TadA-SpCas9(D10A)-2xUGI-NLS)		MKRTADGSEFESPKKKRKVSSEVEFSHEYWMRHALTLAKRARDERKAPVGAVLVLNNRVIGEGWNRAIGLHDPTAHAEIIALRQGGLVMQNYRLIDATLYVTFEPCVMCAGAMINSRIGRVVFGWRNSKRGAAGSLMNVLNYPGMNHRVEITEGILADECAALLCDFYRMPRQVFNAQKKAQSSINSGGSSGGSSGSETPGTSESATPESSGGSSGGSDKKYSIGLAIGTNSVGWAVITDEYKVPSKKFKVLGNTDRHSIKKNLIGALLFDSGETAEATRLKRTARRRYTRRKNRICYLQEIFSNEMAKVDDSFFHRLEESFLVEEDKKHERHPIFGNIVDEVAYHEKYPTIYHLRKKLVDSTDKADLRLIYLALAHMIKFRGHFLIEGDLNPDNSDVD…	ATGAAACGGACAGCCGACGGAAGCGAGTTCGAGTCACCAAAGAAGAAGCGGAAAGTCTCCTCTGAGGTGGAGTTTTCCCACGAGTACTGGATGAGACATGCCCTGACCCTGGCCAAGAGGGCACGGGATGAGAGGAAGGCCCCTGTGGGAGCCGTGCTGGTGCTGAACAATAGAGTGATCGGCGAGGGCTGGAACAGAGCCATCGGCCTACACGACCCAACAGCCCATGCCGAAATTATCGCCCTGAGACAAGGCGGCCTGGTCATGCAGAACTACAGACTGATTGACGCCACCCTGTACGTGACATTCGAGCCTTGCGTGATGTGCGCTGGCGCCATGATCAACTCTAGGATCGGCCGCGTGGTGTTTGGATGGAGAAATTCTAAAAGAGGCGCCGCA…
B3PCY2-CBE (NLS-TadA-SpCas9(D10A)-2xUGI-NLS)		MKRTADGSEFESPKKKRKVSVPLSDRQDDSYWMRRAIALASQGEALGEVPVGAVIVREGIAIGEGFNQPITSRDPSAHAEIVALRQAAAHLQNYRLPGATLYVTLEPCTMCVGALVHARITRLVYGTAEPKAGAVTSRARLLDADYVNHRVSYEGGLMAAECQHQLSHFFQQRRLQHKQARGAGTTNQGIIAVEQSFDEKQLEDDGLPGIGEFGKNTPLKSGGSSGGSSGSETPGTSESATPESSGGSSGGSDKKYSIGLAIGTNSVGWAVITDEYKVPSKKFKVLGNTDRHSIKKNLIGALLFDSGETAEATRLKRTARRRYTRRKNRICYLQEIFSNEMAKVDDSFFHRLEESFLVEEDKKHERHPIFGNIVDEVAYHEKYPTIYHLRKKLVDSTDK…	ATGAAACGGACAGCCGACGGAAGCGAGTTCGAGTCACCAAAGAAGAAGCGGAAAGTCTCCGTGCCCCTGAGCGACAGGCAGGACGACAGCTACTGGATGAGGAGGGCCATCGCCCTGGCCAGCCAGGGCGAGGCCCTGGGCGAGGTGCCCGTGGGCGCCGTGATCGTGAGGGAGGGCATCGCCATCGGCGAGGGCTTCAACCAGCCCATCACCAGCAGGGACCCCAGCGCCCACGCCGAGATCGTGGCCCTGAGGCAGGCCGCCGCCCACCTGCAGAACTACAGGCTGCCCGGCGCCACCCTGTACGTGACCCTGGAGCCCTGCACCATGTGCGTGGGCGCCCTGGTGCACGCCAGGATCACCAGGCTGGTGTACGGCACCGCCGAGCCCAAGGCCGGC…
YE1-BE4Max (NLS-Apobec-SpCas9(D10A)-2xUGI-NLS)		MKRTADGSEFESPKKKRKVSSETGPVAVDPTLRRRIEPHEFEVFFDPRELRKETCLLYEINWGGRHSIWRHTSQNTNKHVEVNFIEKFTTERYFCPNTRCSITWFLSYSPCGECSRAITEFLSRYPHVTLFIYIARLYHHADPENRQGLRDLISSGVTIQIMTEQESGYCWRNFVNYSPSNEAHWPRYPHLWVRLYVLELYCIILGLPPCLNILRRKQPQLTFFTIALQSCHYQRLPPHILWATGLKSGGSSGGSSGSETPGTSESATPESSGGSSGGSDKKYSIGLAIGTNSVGWAVITDEYKVPSKKFKVLGNTDRHSIKKNLIGALLFDSGETAEATRLKRTARRRYTRRKNRICYLQEIFSNEMAKVDDSFFHRLEESFLVEEDKKHERHPIFGN…	ATGAAACGGACAGCCGACGGAAGCGAGTTCGAGTCACCAAAGAAGAAGCGGAAAGTCTCCTCAGAGACTGGGCCTGTCGCCGTCGATCCAACCCTGCGCCGCCGGATTGAACCTCACGAGTTTGAAGTGTTCTTTGACCCCCGGGAGCTGAGAAAGGAGACATGCCTGCTGTACGAGATCAACTGGGGAGGCAGGCACTCCATCTGGAGGCACACCTCTCAGAACACAAATAAGCACGTGGAGGTGAACTTCATCGAGAAGTTTACCACAGAGCGGTACTTCTGCCCCAATACCAGATGTAGCATCACATGGTTTCTGAGCTACTCCCCTTGCGGAGAGTGTAGCAGGGCCATCACCGAGTTCCTGTCCAGATATCCACACGTGACACTGTTTATCTAC…

## Sheet: S2
Supplementary Table 2.	Primers, targets and corresponding amplicon used for evaluating editing efficienct at endogenous loci in this study.
Target loci	Target sequence	PAM	Primer-F	Primer-R	HST-F	HST-R	Amplicon
PIK3CA	GGAACAAGGTACTCTTTGAG	TGT	GAGGTACTGCTTCACCAGCTAAGG	GAGACGGAGTCTCGCTCTGTTG	CCTCCCTTAAGGGGATTGTGG	CAAACTCCGACTTCGTGATCCACC
ABE site 1	GTAAACAAAGCATAGACTGA	GGG	GGCCTTCATATTGGTGTGTCCC	CAGGCATGTACCACCATGCCTA	GAATTCNNNNNNGGATCCCTGCTGCCGTGGGAGACAATTCATA	GAATTCNNNNNNGGATCCAGCTGTTGCATGAGGAAAGGGACTA	CTGCTGCCGTGGGAGACAATTCATATCCTGGTAGAAGAGATAAAGAGTCATACTTAAAGTAAAGCAGAAGGAATAACAGTGCCCCAAATTATTCACTACCCCTGTTCCTAAAGCCCACCATCTTTTGTACACTCAGAGTAAACAAAGCATAGACTGAGGGGTACAATCCTACTCTAGTCCCTTTCCTCATGCAACAGCT
ABE site 2	TAAGCATAGACTCCAGGATA	AGG	GAGCTGAGAGCCCTTGAGTG	CCAGTTCTGGGAAGGCCTCTG	GAATTCNNNNNNGGATCCAGGAGTTCCACCGCCTTGTTTACTG	GAATTCNNNNNNGGATCCGGACTTTGGGGTAGGTTTGCAT	AGGAGTTCCACCGCCTTGTTTACTGCTCAGTCCCCCAGAATGGCAGGCACGTAGTAGGGCTCAGTAAATATTTGCTGAATGAAGTTATGATCGAAAGAATACTAAGCATAGACTCCAGGATAAGGTAAGTAATATAGAGTTCCACAGTGGGCAGGTCTATGCAAACCTACCCCAAAGTCC
B2M	ACTCACGCTGGATAGCCTCC	AGG	CCTGAAGTCCTAGAATGAGCGC	CTTTGGGACGAGCCTACCCG	GAATTCNNNNNNGGATCCGGCGGGCATTCCTGAAGCTGA	GAATTCNNNNNNGGATCCACTTGGAGAAGGGAAGTCACGGA	ACTTGGAGAAGGGAAGTCACGGAGCGAGAGAGCACAGCGAGGGCCACAGAGGGTGCAGAGCGGGAGAGGAAGGACCAGAGCGGGAGGGTAGGAGAGACTCACGCTGGATAGCCTCCAGGCCAGAAAGAGAGAGTAGCGCGAGCACAGCTAAGGCCACGGAGCGAGACATCTCGGCCCGAATGCTGTCAGCTTCAGGAATGCCCGCC
EGFR	GTCCACGCTGGCCATCACGT	AGG	CAGATGGGACAGGCACTGATTTG	GAGGCGGAGGTCTTCATAACAAAGA	GAATTCNNNNNNGGATCCGTCTTCACCTGGAAGGGGTCCAT	GAATTCNNNNNNGGATCCGAAGGGCATGAGCTGCGTGAT	GAAGGGCATGAGCTGCGTGATGAGCTGCACGGTGGAGGTGAGGCAGATGCCCAGCAGGCGGCACACGTGGGGGTTGTCCACGCTGGCCATCACGTAGGCTTCCTGGAGGGAGGGAGAGGCACGTCAGTGTGGCTTCGCATGGTGGCCAGAAGGAGGGGCACATGGACCCCTTCCAGGTGAAGAC
EMX1	GGTACTGTTTCCCCGAGATC	AGG	GAAGGACTTTTCGAACCCTGTAGC	CCCTACCCCTCCGATTTTTCTACA	GAATTCNNNNNNGGATCCAATCGTCCAGGACTCCGAAGGT	GAATTCNNNNNNGGATCCGAAGCTCCGGCCCATTGTAGTT	AATCGTCCAGGACTCCGAAGGTCGGGGCCGCTCGCGAGCACCGAAGGGGAGGAGCCGACGAAGACCAGGAGTGGGCCGCATTTCGGTACTGTTTCCCCGAGATCAGGAACTTTCCGGGTCTAGGAGCAACGCCTGGAGGGGGCTGTAGAGACCCAGCCCCCCGGGACCCGCAACTACAATGGGCCGGAGCTTC
FANCF site 1	GAAGCTCGGAAAAGCGATCC	AGG	CTCCGCCTGGGTCTTCATCA	CCAAAGCGAAAGGAAGCGCG	GAATTCNNNNNNGGATCCAAGGTGAAAGCGGAAGTAGGG	GAATTCNNNNNNGGATCCCATGCCGACCAAAGCGCCGA	GACCAAAGCGCCGATGGATGTGGCGCAGGTAGCGCGCCCACTGCAAGGCCCGGCGCACGGTGGCGGGGTCCCAGGTGCTGACGTAGGTAGTGCTTGAGACCGCCAGAAGCTCGGAAAAGCGATCCAGGTGCTGCAGAAGGGATTCCATGAGGTGCGCGAAGGCCCTACTTCCGCTTTCACCTT
FANCF site 2	CATGCCGACCAAAGCGCCGA	TGG	CTCCGCCTGGGTCTTCATCA	CCAAAGCGAAAGGAAGCGCG	GAATTCNNNNNNGGATCCGGAAGTTCGCTAATCCCGGAACTG	GAATTCNNNNNNGGATCCTCAAGCACTACCTACGTCAGCAC	GGAAGTTCGCTAATCCCGGAACTGGACCCCGCCCAAAGCCGCCCTCTTGCCTCCACTGGTTGTGCAGCCGCCGCTCCAGAGCCGTGCGAATGGGGCCATGCCGACCAAAGCGCCGATGGATGTGGCGCAGGTAGCGCGCCCACTGCAAGGCCCGGCGCACGGTGGCGGGGTCCCAGGTGCTGACGTAGGTAGTGCTTGA
FANCF site 3	TTGCCCAGAGTCAAGGAACA	CGG	CAGGACGTCACAGTGACCGAG	GGAAGGACAATGTGAAGGCCC	GAATTCNNNNNNGGATCCCCCTACATCTGCTCTCCCTCCACTA	GAATTCNNNNNNGGATCCCGACTCTCTGCGTACTGATTGGAAC	CCCTACATCTGCTCTCCCTCCACTAAGAAGAACCTCTTTGTGTGGCGAAAGTAAAAGTATTAGGGCTTTTAAGTTGCCCAGAGTCAAGGAACACGGATAAAGACGCTGGGAGATTGACATGCATTTCGACCAATAGCATTGCAGAGAGGCGTATCATTTCGCGGATGTTCCAATCAGTACGCAGAGAGTCG
GAS2	CGCCGTCTCCAAGGTGAAAG	CGG	GTTGCTGCACCAGGTGGTAAC	GGACAATGTGAAGGCCCAGAA	GAATTCNNNNNNGGATCCCACGGATAAAGACGCTGGGAGAT	GAATTCNNNNNNGGATCCGTAGGTAGTGCTTGAGACCGCC	CACGGATAAAGACGCTGGGAGATTGACATGCATTTCGACCAATAGCATTGCAGAGAGGCGTATCATTTCGCGGATGTTCCAATCAGTACGCAGAGAGTCGCCGTCTCCAAGGTGAAAGCGGAAGTAGGGCCTTCGCGCACCTCATGGAATCCCTTCTGCAGCACCTGGATCGCTTTTCCGAGCTTCTGGCGGTCTCAAGCACTACCTAC
HBG	AGCTCCTAGTCCAGACGCCA	TGG	GGTGCCCTTGAGATCATCCAGG	CGGCTGACAAAAGAAGTCCTGG	GAATTCNNNNNNGGATCCTAGAGTATCCAGTGAGGCCAGGGG	GAATTCNNNNNNGGATCCTTGCCCCACAGGCTTGTGATAGTAG	TAGAGTATCCAGTGAGGCCAGGGGCCGGCGGCTGGCTAGGGATGAAGAATAAAAGGAAGCACCCTTCAGCAGTTCCACACACTCGCTTCTGGAACGTCTGAGGTTATCAATAAGCTCCTAGTCCAGACGCCATGGGTCATTTCACAGAGGAGGACAAGGCTACTATCACAAGCCTGTGGGGCAA
HEK3	CGTGCTCAGTCTGGGCCCCA	AGG	CTTGTAGCTACGCCTGTGATGG	CAATGTCTCTGACCACTGCGA	GAATTCNNNNNNGGATCCCCCAGCCAAACTTGTCAACCAGT	GAATTCNNNNNNGGATCCGGAAACGCCCATGCAATTAGTCTAT	CCCAGCCAAACTTGTCAACCAGTATCCCGGTGCAGGAGCTGCACATACTAGCCCCTGTCTAGGAAAAGCTGTCCTGCGACGCCCTCTGGAGGAAGCAGGGCTTCCTTTCCTCTGCCATCACGTGCTCAGTCTGGGCCCCAAGGATTGACCCAGGCCAGGGCTGGAGAAGCAGAAAAAAAGCATCAAGCCTACAAATGCATGCTTACTTGCAGCAGAAATAGACTAATTGCATGGGCGTTTCCCTGGGATCCCTGTCTCCAGGCTTCTCTCATCCATGCCTTTCTAGGCAGCCCACAT
HEK4 site 1	AAAACCGAGGGGTAAGAATC	TGG	GCGGCATCCAAAGAATTAACCCTTC	CTACCTGGGTTCCAGACCCTG	GAATTCNNNNNNGGATCCAAGTGCTAGGAACAGAATGAAATAGGA	GAATTCNNNNNNGGATCCGCGTTTCCTTGTGATGGTGACTTTG	AAGTGCTAGGAACAGAATGAAATAGGATAGGAGTGATGGACAGGGGAGACTTCAGGTGGAGTCATCGGGAAAAGCCTCTCCATAAAGTGACCTTCTGGGAGAAAACCGAGGGGTAAGAATCTGGTCCTGCAAAGATCTGGGCAAGAAATGTCCAGGTGTAGGGAACAGCGAGGTCAAAGTCACCATCACAAGGAAACGC
HEK4 site 2	GGCACTGCGGCTGGAGGTGG	GGG	CCTATAGGGGCTTACAGGCGAT	GGTGCCGACTCCCCTTGTAG	GAATTCNNNNNNGGATCCGAACCCAGGTAGCCAGAGAC	GAATTCNNNNNNGGATCCTCCTTTCAACCCGAACGGAG	GAACCCAGGTAGCCAGAGACCCGCTGGTCTTCTTTCCCCTCCCCTGCCCTCCCCTCCCTTCAAGATGGCTGACAAAGGCCGGGCTGGGTGGAAGGAAGGGAGGAAGGGCGAGGCAGAGGGTCCAAAGCAGGATGACAGGCAGGGGCACCGCGGCGCCCCGGTGGCACTGCGGCTGGAGGTGGGGGTTAAAGCGGAGACTCTGGTGCTGTGTGACTACAGTGGGGGCCCTGCCCTCTCTGAGCCCCCGCCTCCAGGCCTGTGTGTGTGTCTCCGTTCGGGTTGAAAGGA
KCNA2	CAACCGGATGACACGGAGGA	TGG	GTTGAAATTGGACACAATGACAGGGAC	GCTATTGTGTCTGTCATGGTGATTCTG	GAATTCNNNNNNGGATCCCTGGCTTTGAGGGTCTGACCT	GAATTCNNNNNNGGATCCCATTGTGGCCATCATCCCCTACT	CTGGCTTTGAGGGTCTGACCTAGAATCTGGAGACCTTTGGAGTGTCTGGACAACTTGAAAATCCTAAAGACTCTTACCAACCGGATGACACGGAGGATGGCCAGTGACATGGCCTGCTGGCCTTGCTGAGCGTCCTCTGGCTTCTCAGCCAACTCTGTCCCCAGGGTGATGAAGTAGGGGATGATGGCCACAATG
NIBAN1	ACACACACACTTAGAATCTG	TGG	GGTCCGCGCCTTCTGATGATC	GAAATCAGCGGTGACCCCTCT	GAATTCNNNNNNGGATCCGCAACAGTTCTTCCCAAGCATTACCTG	GAATTCNNNNNNGGATCCGGTTCTCGCCTGCAGAAAGGTATAG	GCAACAGTTCTTCCCAAGCATTACCTGGGAGCCTGTTAGAAATACAAAATCTCAGCGCTTTCGTCCACCACCCCTCTACACACACACAGACACACACACACTTAGAATCTGTGGGAGTGGAGCCCAGCAATCTGTGTTTGCACAAACCCTCCAGGGAATTCTGATGCCCGCTGAAGTTTGAGAACTAGAGGTAAACTATACCTTTCTGCAGGCGAGAACC
OX40-sg1	ACACCTACCCCAGCAACGAC	CGG	CCGCTGTGGTTTGAGGTTCG	CTGCCTCAGTTTACCCACGTG	GAATTCNNNNNNGGATCCGCAGAGACGAGGATGTGCGT	GAATTCNNNNNNGGATCCCTCCTGGCTGGCCCATCCCTG	GCAGAGACGAGGATGTGCGTGGGGGCTCGGCGGCTGGGCCGCGGGCCGTGTGCGGCTCTGCTCCTCCTGGGCCTGGGGCTGAGCACCGTGACGGGGCTCCACTGTGTCGGGGACACCTACCCCAGCAACGACCGGTGCTGCCACGAGTGCAGGCCAGGTGAGGCCTCAGGAGGGGTCGCCACGCACGGGCACTCCAGGGACTGGGGGCTGGGGCAGGGATGGGCCAGCCAGGAG
POLR1C sg1	CAGGCCGGAAGAGGCAAGCA	TGG	GCCACGTTCTAGAAAACTACTTCCTAG	CAAGATGAGGCTTAATTCTGCCTGG	GAATTCNNNNNNGGATCCAAGGGATGTGGTGCATTTGGA	GAATTCNNNNNNGGATCCACCATGCCATGTCCCTAGAAAGCAG	AAGGGATGTGGTGCATTTGGAATCACCTATGAAGCCGGGGACCCAGAGATGCATAAAACAGGTTTTTGCTCTCAAGACCCACAATCCAGGCCGGAAGAGGCAAGCATGGAAACAGACCTGGCAGAAACACTTCAGGGCTGTTTAATACAGAGGATACTGTCACTCTTTCTGCTTTCTAGGGACATGGCATGGT
SRPK3	CGTCGCCGAT CTTCACAGGG	TGG	CTCATGCCCACTGCCACTCA	GCCTGTTCCTCCAGATCCTCC	GAATTCNNNNNNGGATCCCCCTCCACCCCAATCTACATCTCC	GAATTCNNNNNNGGATCCCAAGCAAGCCCAGGGACAGGATC	CAAGCAAGCCCAGGGACAGGATCCCAGCCAGTGCTGGGCCCCGGAGGCGAAGGAGGCACTCACTGGATGTCCCAGCAGAGCCAGACGGTGGAGAAGTGGCCCCAGCCCAGTTTGCGCACCACGTGGTACCGCCCATTGAACACGTCGCCGATCTTCACAGGGTGGTAGCCGCCTGCCCAGGGGAGATGTAGATTGGGGTGGAGGG
SSH2	TCACTCCCTCTTCAAGCTGA	CGG	GGCTTTCAAGCATTTGGCCTAAGT	GAAATAGGACATGGGACTAGGTTGGTTA	GAATTCNNNNNNGGATCCCTGGAAGTCACGAGTTCTTGATGG	GAATTCNNNNNNGGATCCCATTGCACTTCAGCCTGGGTGATA	CATTGCACTTCAGCCTGGGTGATAGGGCAAGACTCTGTCCCAAAAAACAAAAAAAGAAAAAAAGAAAGAAAAAATTCAGGAATCAGGGGTCTAGGAGTCTCCCTCAGCTTGAAGAGGGAGTGAGCACATGGGAATTACAAGGAGAGGGAGTTGTAATCAGAAAGTGAGTTTAATTTCTGAAATTAAGTCCATCAAGAACTCGTGACTTCCAG
TP53	TTACCTCGCTTAGTGCTCCC	TGG	GCTACAACCAGGAGCCATTGTC	GCATGAACCGGAGGCCCATC	GAATTCNNNNNNGGATCCCTGAGGCATAACTGCACCCTTGG	GAATTCNNNNNNGGATCCAACAGCTTTGAGGTGCGTGTTTGTG	CTGAGGCATAACTGCACCCTTGGTCTCCTCCACCGCTTCTTGTCCTGCTTGCTTACCTCGCTTAGTGCTCCCTGGGGGCAGCTCGTGGTGAGGCTCCCCTTTCTTGCGGAGATTCTCTTCCTCTGTGCGCCGGTCTCTCCCAGGACAGGCACAAACACGCACCTCAAAGCTGTT
TRAC	TTCGTATCTGTAAAACCAAG	AGG	CACAAGGCATGTGGTGTACACAAGT	GAGTCATCCTTCCTGTGGTAGCG	GAATTCNNNNNNGGATCCCGCAGCGTCATGAGCAGATT	GAATTCNNNNNNGGATCCCTCTGCCTTGGGGAAAACCGT	CGCAGCGTCATGAGCAGATTAAACCCGGCCACTTTCAGGAGGAGGATTCGGAACCCAATCACTGACAGGTTTTGAAAGTTTAGGTTCGTATCTGTAAAACCAAGAGGCCACAGCGGTTATGGGCTTGCATGTCCCAGGCCTGCATGGCCTGCAGGACACACCCACGGTTTTCCCCAAGGCAGAG
TTR site 1	TGCACGGCCACATTGATGGC	AGG	CCTGTTTGGCCCTATGTATGGTAC	GTGACCCAAAAGGGTTGCAAAC	GAATTCNNNNNNGGATCCGTGTCTTCTCTACACCCAGGGCAC	GAATTCNNNNNNGGATCCCAAGTCCTGTGGGAGGGTTCTTTGGCA	CAAGTCCTGTGGGAGGGTTCTTTGGCAACTTACCCAGAGGCAAATGGCTCCCAGGTGTCATCAGCAGCCTTTCTGAACACATGCACGGCCACATTGATGGCAGGACTGCCTCGGACAGCATCTAGAACTTTGACCATCAGAGGACACTTGGATTCACCGGTGCCCTGGGTGTAGAGAAGACAC
TTR site 2	GGGCGGCAATGGTGTAGCGG	CGG	CATCCTGACTTTCGGCGTGAA	CACAGTAAAGAAGTGGGCCCTTG	GAATTCNNNNNNGGATCCCTCTTGGTTACATGAAATCCCATCCCT	GAATTCNNNNNNGGATCCGCTCTGGTGGAAATGGATCTGTCT	CTCTTGGTTACATGAAATCCCATCCCTCGTCCTTCAGGTCCACTGGAGGAGAAGTCCCTCATTCCTTGGGATTGGTGACGACAGCCGTGGTGGAATAGGAGTAGGGGCTCAGCAGGGCGGCAATGGTGTAGCGGCGGGGGCCGGAGTCGTTGGCTGTGAATACCACCTATGAGAGAAGACAGACAGATCCATTTCCACCAGAGC
VEGFA	GTGTGCAGACGGCAGTCACT	AGG	CATACGTGGGCTCCAACAGGT	GCAATGAAGGGGAAGCTCGAC	GAATTCNNNNNNGGATCCGAAATAGGGGGTCCAGGAGCAAAC	GAATTCNNNNNNGGATCCCTCACTCACCCACACAGACACA	GAAATAGGGGGTCCAGGAGCAAACTCCCCCCACCCCCTTTCCAAAGCCCATTCCCTCTTTAGCCAGAGCCGGGGTGTGCAGACGGCAGTCACTAGGGGGCGCTCGGCCACCACAGGGAAGCTGGGTGAATGGAGCGAGCAGCGTCTTCGAGAGTGAGGACGTGTGTGTCTGTGTGGGTGAGTGAG
ZSCAN2	GTGCGGCAAGAGCTTCAGCC	GGG	CAGAGTTCAGCCCTCATCACCCA	GTATACGGGACTTGACTCAGACCA	GAATTCNNNNNNGGATCCGTAGTGCACCAGCGGACCCACACG	GAATTCNNNNNNGGATCCGTTAGAGCTGTTGCTGAAGCCTTTG	GTAGTGCACCAGCGGACCCACACGGGCGAGAAGCCCTACAAATGCCTCATGTGCGGCAAGAGCTTCAGCCGGGGCTCCATTCTGGTCATGCACCAGAGAGCCCATTTGGGAGACAAGCCCTACAGGTGCCCTGAGTGTGGGAAAGGCTTTAGCTGGAACTCAGTCCTCATTATACATCAGCGAATCCACACTGGGGAGAAGCCCTACAAATGCCCCGAGTGTGGCAAAGGCTTCAGCAACAGCTCTAAC

## Sheet: S3
Supplementary Table 3.	Primers and corresponding amplicons for Cas9-denpendent off-target sites.
Off-targets	sequence	HST-F	HST-R	Amplicon	Identification method
ABE site 2-OT1	TGAGCATAGACTCCAGGAGATGG	GAATTCNNNNNNGGATCCCCATCATCTCCCACCTGGATTGTC	GAATTCNNNNNNGGATCCCCATCATCTCCCACCTGGATTGTC	AGGGTCAAAGTGCCTAATCCTTAGCATGTACTCAATAACAGCAGAGGAAACAACTATAGTCACAATGGCTGCTGTTTTGAGCATAGACTCCAGGAGATGGGTGAAGAAAGAAAGAGCACAGTTAAGAGCCATTGTGACAATCCAGGTGGGAGATGATGGC	Cas-Offinder
ABE site 2-OT2	TTAGCAGAGACTCCAGGATCTGG	GAATTCNNNNNNGGATCCGAAGGGGATTGAGGTTTCCAGGG	GAATTCNNNNNNGGATCCCCTCACACGGCTTTTGCACTTC	GGGGATTGAGGTTTCCAGGGGGAACTAGTTGCAATTTAAAATTGAGAAATCAGCAAAGCCCTCAGTGACAAAGGGAAGTTTTAGCAGAGACTCCAGGATCTGGGGTGCAAGAAAGGTGGACTTCTGGGTGAAGTGCAAAAGCCGTGTG	Cas-Offinder
ABE site 2-OT3	TAAGCACAGGCTCCAGTATAAGG	GAATTCNNNNNNGGATCCTGGGTAAGATTTTGGCACGTGGAAT	GAATTCNNNNNNGGATCCGCGCATTTCCTCCTCTGCCTTTTTC	AGATTTTGGCACGTGGAATTCTCGTGCAGGAGGAGAAATCCCGCATTCCAGGGATGGTGAACAACTGGAGGTGAAGGGACAGATAAGCACAGGCTCCAGTATAAGGAACAGTGAGTAACTCCATAAGATAATGACGGAAAAAGGCAGAGGAGGAA	Cas-Offinder
ABE site 2-OT4	CAGGCATAGACTCCAGGAAAGGG	GAATTCNNNNNNGGATCCCAGGACTAAAATGAGAGCCTGCTGAC	GAATTCNNNNNNGGATCCGACACATGTTCAAACTATCTGAGATGAA	AAAATGAGAGCCTGCTGACTCCAAATCCAGTGACACTCTCCACGCACATGTCCTTAAATACAATTTCTTCTTAGTTGAAGATATAGATGCCAGGCATAGACTCCAGGAAAGGGTACCTCCCGGGAGTAAATATGCATAAAATATATATAAATATTCATCTCAGATAGTTTGAACA	Cas-Offinder
ABE site 2-OT5	TAAGATTTGACTCCAGGATATGG	GAATTCNNNNNNGGATCCACAGATTCTAAAAGCTACCACAAAGCCA	GAATTCNNNNNNGGATCCctgtCCACTGCGCCATGTGATT	TCTAAAAGCTACCACAAAGCCAAAACAAAATGAAATTTAATGAGGATAAGTGTGAGACGTTCTTAAATGCAATAAATCCCTTGTACAAGCCCCAGATGATTAAGATTTGACTCCAGGATATGGAGGCTCTTCCTTCATGAAAGACTCCATTTAAAGCCAATCACATGGCGCAGTGG	Cas-Offinder
ABE site 2-OT6	TCAGCATAGCCTCCTGGATAGGG	GAATTCNNNNNNGGATCCGAAGCTAAAGGATTGCCTGGTCCc	GAATTCNNNNNNGGATCCGAGGTTCAAATTTAACAGGGCATCGTGT	TAAAGGATTGCCTGGTCCCCACCCCCTGCAGTGGGTAAGGTGTCTGTGCTTTGTTCTGTGGTAGCCTCCCTGTTGCTCTTTGACAAGGTTTGGTCAGCATAGCCTCCTGGATAGGGGTGACAGATAAAATACACGATGCCCTGTTAAATTT	Cas-Offinder
ABE site 2-OT7	TAAGCAGAGATGTCAAGGATAAGG	GAATTCNNNNNNGGATCCATCACCAGGAATAGAGTAACTGGAG	GAATTCNNNNNNGGATCCTCTCCCTGGATTTTTATGGTGGTTT	AGGAATAGAGTAACTGGAGTAAAGGATAATGGCATTGCAATTGTTAATAGAGTGGTGTATATACAGGCTTGAAAGATAAGCTTACATTTAAGCAGAGATGTCAAGGATAAGGTTGTTTGATTTTTAAAAAAGTACAGTACTTTGGTAAAAACCACCATAAAAATCCA	Cas-Offinder
ABE site 2-OT8	TAAGCATAGTCTCCATGCTTATGG	GAATTCNNNNNNGGATCCTCACTTGGATTTGCTGTTTTGCTTGAA	GAATTCNNNNNNGGATCCTCCCTCCCCGAGCTTACTGGAAAAG	GGATTTGCTGTTTTGCTTGAATCTCTGTGGAAATGACTAATGCAGAGCATTATAAGCATAGTCTCCATGCTTATGGAGCATGGGCCATTATGGCCCAGTGGGAAATGGAGAATTGTAAACATGAAGAGGGAACTTTTCCAGTAAGCTCGGG	Cas-Offinder
TP53-OT1	CTTACCTCACTTAGTGCCCACAGG	GAATTCNNNNNNGGATCCACGAACTCTTGTTGAAAGAGAAAAGT	GAATTCNNNNNNGGATCCAGGGAAGGTAGTTTCCTATCACCTAT	TCTTGTTGAAAGAGAAAAGTAGGAGGAAGGAGAGGTGGAGGGAGGGAGGGAGAGGAAGATAAGACTACTGATTCCTGAGCTCACTTTCCCTTACCTCACTTAGTGCCCACAGGAAGAGTATCCCATGGGACACGTGTGACATTTCTGGACTTGTAAATAGGTGATAGGAAACTACC	Cas-Offinder
TP53-OT2	CTAGCCTCGCTTAGTGCAGTCCCAGG	GAATTCNNNNNNGGATCCGGTGCCACTGGGAAAGCATGAAT	GAATTCNNNNNNGGATCCCAACGGGACTGAGCTGGACATAAG	GCAAGGTGCCACTGGGAAAGCATGAATGTAGTCCCTACTGTGTTCTTGGGCCTTGTGCTGGACCCTGAAGATAAAGCGAGAGAAAGTGCACAGTGTCCTTCCTAGCCTCGCTTAGTGCAGTCCCAGGGGGACGGGGCACAGGCGCTGTTGTAATTCAGTGCTCCTTATGTCCAGCTCAGTCCCGTTGG	Cas-Offinder
TP53-OT3	CTTGCTCTCCCTTAGTGTTCCCTGG	GAATTCNNNNNNGGATCCCTTTTCGGTAGAGGAGAGGCCCATCA	GAATTCNNNNNNGGATCCTGGGAGCTGTTTATCTCCATCCAACT	GGTAGAGGAGAGGCCCATCACTGGTGTGGTGGGGTGGGCTCTCCCTTAGGCTTGGGCAAGGCAGCCACCTGCCCTTGCTCTCCCTTAGTGTTCCCTGGCCTCCCTGCCATCAGGTTGCTGGGAGTGGAGATGGAGGGATTATTGAGCAGAAAATGAGTTGGATGGAGATAAACAG	Cas-Offinder
TP53-OT4	CTTTCCTCAGCTGGGTGCTCCCTGG	GAATTCNNNNNNGGATCCCTTTTCTCCGTCCGCTCGTCAAGG	GAATTCNNNNNNGGATCCGGCAGCGTGGAGGGAGCATATAG	TCCGTCCGCTCGTCAAGGGTCTCAGCCGCCTTCGGGGCCGGGGTATGAGATGAGAGAGGGCTGGGGTTTCCCGCCAAGTCTTTCTTGCTTTCCTCAGCTGGGTGCTCCCTGGGCCATCCTCTCCGCCCGGTGGTCTCCCCTGCCCTATATGCTCCCTCCAC	Cas-Offinder
TP53-OT5	CTGTCCTCTGCTTAGGGCTCCCAGG	GAATTCNNNNNNGGATCCCTGGTTTCCCAAAGTTATTCACCCAGA	GAATTCNNNNNNGGATCCCTACTGGGAAGGCCAGGATCCAAAG	TCCCAAAGTTATTCACCCAGATAACTTACCCAATAAGGAAGACTTTTTGCAATTAGTTACTTCTGCCCACTTACCATCTTCTGTCCTCTGCTTAGGGCTCCCAGGTACAGTTGCACAGGCTGAGCGTTGCACAACTTTGGGAGTGTCTTTGGATCCTGGCCTTCC	Cas-Offinder
TP53-OT6	CTTTCCTCCCTGAGTGGCTCCCTGG	GAATTCNNNNNNGGATCCTCATGAGAAGCTGTTACAATTGGCGA	GAATTCNNNNNNGGATCCCTCTTTCTGGCACCTTTGCACCCTA	GAAGCTGTTACAATTGGCGAGTGTGAAGGTAATGTGGTAGGAGGAAGAATGTCTTTCCTCCCTGAGTGGCTCCCTGGGCTCTGTGAAAAATTGGTAATAATCATTCCTACTTCTTTTCTTGTGCATAACGTAGGGTGCAAAGGTGCCAG	Cas-Offinder
TP53-OT7	ATTCCCTAAGCTTAGTGCTCCCTGG	GAATTCNNNNNNGGATCCTGCAGCAAGCAACCTTGAGGAATAA	GAATTCNNNNNNGGATCCTCCAACACACTTCAAGTCCCACAGG	AAGCAACCTTGAGGAATAAGATAATGTCTCCCTCCAGACAGACAGCAGGTTTGCTTACTATAAAAGCAGCATATTCCCTAAGCTTAGTGCTCCCTGGCTGCCACACGAACCAGCTATGTGTAAACATCAACATAGGCCTTTCTGCATTGCCCCTGTGGGACTTGAAGTGT	Cas-Offinder
TP53-OT8	CTTGCCTCTGCTGAGTGTTCCCAGG	GAATTCNNNNNNGGATCCTCTCCCTGTCTCTCCTCTTCCCATT	GAATTCNNNNNNGGATCCAGAGAATTCTGTGGCCCTACTCAAGG	CTGTCTCTCCTCTTCCCATTTTTTGTTGGTGGTGTTTCTGCTCTGTCAGAACACACGGTATTCTTAGGTACACAATTTACTACAACAGGGCTCCCGCTTGCCTCTGCTGAGTGTTCCCAGGTGTCTTCAGGTTGGTGAAGCTCATCCTCAGGCAGTGGCCTTGAGTAGGGCCACAGAA	Cas-Offinder

## Sheet: S4
Supplementary Table 4.	Primers and corresponding amplicons for in vivo editing study.
	Primer name	Primer sequence (5'-3')	Product
sgRNA for generation DMD△ E54mouse	DMD-T7-g1	TTTCTGCAAGTGCAGAGAGG
	DMD-T7-g2	GGTGTGTGGAGTGAGATACT
Genotyping of DMD△ E54 and DMD△ E54 mdx mouse	Exon55-KO-1995F	TCCCCAGCAGTAATACGTGA	WT 2278bp KO 673bp
	Exon55-KO-1995R	TTTTCAGCTTGCACAAGGT
Genotyping of mdx mouse	Mdx-2395F	CACTTTACCACCAATGCGCTA	2395 bp
	Mdx-2395R	AAGAAAATGCAAAAGGACCCC
RT-PCR primer flanking human exon 55	RNA-E55F	AGGCTAGAACAATCATTACGG	No exon skpping (537bp) Exon skpping (347bp)
	RNA-E55R	TAACAGGACTGCATCATCGGAA
PCR primer flanking human exon 55	DNA-E55-918F	GAGCAGCATCAAAGACAAGCA	918bp
	DNA-E55-918R	GTTTCTCCTTGACCGAAGCTCT
	Target of CBE
DNA base editing sgRNA in human exon55	TCACCCTGCAAAGGACCAAA
